# Supplementary material for: Stage-dependent transcriptional regulation of ICOS across metabolic liver disease progression and hepatocellular carcinoma
Source: Research Square preprint supplement (doi:10.21203/rs.3.rs-8834306/v1), 2026-02-11
Supplement: Supplementary file 1 [file 29936174e310b752b04f65af.xlsx]

## Sheet: GSE164760_ICOS_pairwise_MannWhi
Gene	Group_1	Group_2	U_statistic	P_value	Median_1	Median_2	N_1	N_2	FDR
ICOS	Tumor	Adjacent	670.0	0.3418709282	22.13992853	23.64001236	53	29	0.3594940114
ICOS	Tumor	NASH	2372.0	0.04475082796	22.13992853	19.80604728	53	74	0.08950165592
ICOS	Adjacent	NASH	1466.0	0.004001381731	23.64001236	19.80604728	29	74	0.01600552693
ICOS	Tumor	Cirrhosis	168.0	0.3594940114	22.13992853	24.21778113	53	8	0.01600552693
