# Supplementary material for: Stage-dependent transcriptional regulation of ICOS across metabolic liver disease progression and hepatocellular carcinoma
Source: Research Square preprint supplement (doi:10.21203/rs.3.rs-8834306/v1), 2026-02-11
Supplement: Supplementary file 2 [file 81b11476eb5a604e8956a834.xlsx]

## Sheet: Hallmark_GSEA_ICOSHigh_vs_ICOSL
,Name,Term,ES,NES,NOM p-val,FDR q-val,FWER p-val,Tag %,Gene %,Lead_genes
0,prerank,Allograft Rejection,-0.6919328998484737,-1.6679862003703556,0.0013157894736842105,0.2324459930313589,0.226,18/183,5.30%,RPL39	TIMP1	EIF5A	CD74	RPL9	B2M	MRPL3	RPS3A	INHBA	RPS9	ACVR2A	AKT1	MTIF2	SPI1	FAS	STAB1	GBP2	EIF3D
1,prerank,TNF-alpha Signaling via NF-kB,0.6620857680770489,1.6158813305370114,0.021660649819494584,0.7223362831858408,0.384,47/195,6.88%,CXCL2	BHLHE40	CEBPD	TRIB1	JUNB	GADD45B	SIK1	SDC4	MYC	IL6ST	CEBPB	EIF1	CCND1	FOSB	TNFRSF9	DUSP4	CCL2	SERPINE1	SQSTM1	IER2	JUN	SOD2	PFKFB3	ZBTB10	TNFAIP3	CCL20	ZC3H12A	NAMPT	PLAUR	IL23A	MSC	KLF4	SPSB1	TGIF1	BIRC3	NFIL3	CXCL10	CCRL2	PHLDA1	TANK	IL15RA	ETS2	NR4A3	ATF3	ICAM1	NFKBIE	NR4A2
2,prerank,Myc Targets V1,-0.6357744532133582,-1.5237140192745844,0.024861878453038673,0.47310104529616726,0.628,39/185,7.25%,RPS3	FAM120A	HNRNPA1	HNRNPA2B1	APEX1	PSMA6	RPS6	SSB	PSMA4	ERH	SET	HNRNPR	KPNB1	AP3S1	RPL22	HNRNPC	RPS10	MRPS18B	FBL	EIF4H	TCP1	BUB3	HPRT1	GSPT1	PTGES3	RNPS1	HSP90AB1	CANX	XPOT	CDK4	EIF3D	RPL14	CAD	RPS5	UBE2E1	TUFM	RANBP1	PSMD8	ODC1
3,prerank,Reactive Oxygen Species Pathway,0.6714143251538544,1.5223305642150076,0.11875,0.6174159292035398,0.567,12/45,4.07%,MGST1	FTL	JUNB	TXNRD1	PDLIM1	NQO1	SOD2	PRDX1	PRDX4	GLRX	PRDX6	SOD1
4,prerank,UV Response Up,0.6279993045191018,1.517991805277345,0.04744525547445255,0.4192330383480827,0.572,14/149,2.44%,CXCL2	TMBIM6	GGH	JUNB	C4BPB	IL6ST	CEBPG	FOSB	GRINA	ALAS1	ONECUT1	CA2	SQSTM1	SOD2
5,prerank,Complement,-0.629048389674381,-1.495695519709265,0.024691358024691357,0.39057839721254356,0.704,22/194,4.60%,HSPA1A	SERPINC1	C1S	SERPINA1	TIMP1	PRCP	COL4A2	BRPF3	C9	CALM1	CFB	DOCK9	ATOX1	F10	F5	CSRP1	GNAI2	FCER1G	CTSO	USP14	C1R	SERPING1
6,prerank,UV Response Dn,-0.5915141494201708,-1.364636958930804,0.0856353591160221,0.6817839721254356,0.94,38/137,7.97%,INSIG1	FBLN5	COL1A1	ZMIZ1	COL1A2	COL3A1	ATRN	CITED2	CDK13	ANXA2	EFEMP1	PRKCA	NEK7	ACVR2A	IRS1	TJP1	ID1	PTPRM	IGFBP5	PMP22	SMAD3	TFPI	PTPN21	ANXA4	LAMC1	NFKB1	MAP1B	PHF3	TGFBR3	MAPK14	DDAH1	NIPBL	MET	LTBP1	FYN	DBP	APBB2	RXRA
7,prerank,Xenobiotic Metabolism,0.5244899785673007,1.332374134298612,0.152,0.7330973451327434,0.839,34/194,2.35%,CRP	TMBIM6	ARG1	SLC22A1	CYP2E1	MT2A	ADH1C	CES1	G6PC	CYP27A1	FBP1	IGFBP1	ITIH1	AKR1C2	CYB5A	CYP2C18	AOX1	NQO1	TTPA	ANGPTL3	NDRG2	PLG	CYFIP2	ALAS1	ALDH2	CA2	ABCC3	SERPINE1	GSTO1	SSR3	CNDP2	UGDH	PC	LEAP2
8,prerank,Angiogenesis,-0.6336008680225546,-1.3181838676581639,0.1453125,0.7218787456445993,0.975,7/36,3.26%,VTN	TIMP1	COL3A1	SERPINA5	LUM	POSTN	FSTL1
9,prerank,Hypoxia,0.5437845793522018,1.3142140854040993,0.1553030303030303,0.6257557522123894,0.859,39/189,5.19%,BHLHE40	MT2A	PRDX5	FBP1	ALDOB	SDC2	IGFBP1	ENO1	HSPA5	TGM2	CP	SDC4	GRHPR	SIAH2	TPI1	TMEM45A	SLC25A1	PLIN2	MIF	PKLR	MT1E	SERPINE1	STC1	GAPDH	JUN	PFKFB3	PLAC8	TNFAIP3	SAP30	PLAUR	EXT1	GLRX	DDIT4	PDK1	ISG20	PFKL	XPNPEP1	NFIL3	INHA
10,prerank,Mitotic Spindle,-0.5540060756573464,-1.3096279544305578,0.10290237467018469,0.6302253193960511,0.981,33/196,9.71%,RANBP9	MYH9	EPB41L2	PALLD	ARHGDIA	UXT	MYH10	CAPZB	CSNK1D	CDC42EP4	ARF6	ACTN4	MID1IP1	SOS1	NET1	RASA1	CKAP5	MARCKS	MAPRE1	WASL	ARHGAP10	SMC1A	RABGAP1	ARHGAP5	KIF5B	PPP4R2	AKAP13	FLNA	GSN	FSCN1	MARK4	FARP1	RICTOR
11,prerank,Notch Signaling,-0.6475510756677255,-1.2988407321473248,0.17557251908396945,0.5741403683424589,0.983,10/32,12.51%,RBX1	MAML2	PRKCA	TCF7L2	HEYL	APH1A	DTX2	ST3GAL6	PPARD	NOTCH3
12,prerank,Androgen Response,-0.5689897533178052,-1.2846981368472465,0.1647887323943662,0.5417979094076655,0.989,28/95,9.20%,INSIG1	ZMIZ1	SAT1	B2M	NCOA4	GSR	TMEM50A	HMGCS1	APPBP2	SORD	IQGAP2	MYL12A	ACSL3	HPGD	AKT1	DHCR24	SRP19	PTPN21	MAF	HOMER2	AZGP1	STEAP4	ELOVL5	DBI	ANKH	HMGCR	LIFR	UAP1
13,prerank,Hedgehog Signaling,-0.6190231349060887,-1.269307182808922,0.19254658385093168,0.5193310104529616,0.992,4/34,5.94%,DPYSL2	MYH9	RASA1	THY1
14,prerank,Oxidative Phosphorylation,-0.5278103252721703,-1.2683248219700143,0.14092140921409213,0.4705087108013937,0.992,42/180,11.10%,UQCRFS1	PHYH	VDAC2	COX7C	GPX4	ALDH6A1	ATP6V0E1	DLST	NDUFB1	MGST3	NDUFS6	PDK4	GLUD1	NDUFB6	MAOB	OAT	RHOT1	ATP1B1	POR	MDH2	COX8A	NDUFC2	COX7A2	COX4I1	MDH1	CYB5R3	NDUFA8	ATP6V1D	FDX1	NDUFB7	VDAC3	NDUFA6	MRPL11	SLC25A6	ACADM	ATP6V1F	HADHB	SLC25A11	SLC25A3	NQO2	ETFDH	UQCR10
15,prerank,Epithelial Mesenchymal Transition,-0.5274819383520739,-1.2565918880316447,0.1393103448275862,0.4546797592651251,0.992,40/194,4.79%,THBS2	TIMP1	TIMP3	FBLN5	VIM	COL1A1	DCN	ANPEP	COL5A1	COL1A2	SAT1	COL3A1	BGN	COL4A1	TAGLN	GEM	COL4A2	CALD1	SPARC	MYL9	MYLK	CXCL12	ID2	MMP2	HTRA1	IGFBP2	INHBA	VCAM1	TGFBI	LUM	TPM4	POSTN	FSTL1	ELN	PMP22	FAS	COL7A1	COL5A3	THBS1	LAMC1
16,prerank,Adipogenesis,-0.5182912871476352,-1.2244778116377752,0.15650969529085873,0.48253426248548204,0.996,41/187,8.64%,APLP2	UBC	PHYH	GPX3	SPARCL1	GPX4	COL4A1	REEP5	MGST3	ACLY	MYLK	DHRS7	DNAJC15	CD302	TST	DDT	PEMT	MTCH2	ALDOA	COL15A1	CMBL	POR	MDH2	COX8A	TOB1	CRAT	RNF11	YWHAG	UBQLN1	EPHX2	ESYT1	CAT	BAZ2A	NKIRAS1	NDUFB7	GBE1	RAB34	BCL6	PDCD4	GADD45A	LIFR
17,prerank,Pperoxisome,-0.5331118996184022,-1.223915818339181,0.19318181818181818,0.4469450549450549,0.996,14/101,6.78%,ALB	SERPINA6	YWHAH	CTBP1	ABCB4	GSTK1	ACSL1	DHCR24	SLC27A2	CRAT	FIS1	CADM1	EPHX2	ELOVL5
18,prerank,Apical Junction,-0.5142755024372161,-1.222442762780486,0.17724867724867724,0.4189706321553011,0.997,48/194,13.89%,INSIG1	YWHAH	MYH9	EPB41L2	MYL9	SHC1	VASP	ACTB	MMP2	MYH10	VCAM1	MSN	IRS1	GNAI2	TJP1	TGFBI	TRO	MPP5	ARPC2	ACTN4	PECAM1	PARD6G	RASA1	CRAT	PARVA	WASL	THY1	LAMA3	MAPK14	CD99	SKAP2	GNAI1	ITGA2	FSCN1	CLDN11	JUP	CTNND1	TIAL1	RSU1	LIMA1	CDK8	ICAM2	CD276	SGCE	VAV2	PKD1	VCL	MDK
19,prerank,TGF-beta Signaling,-0.566554532943298,-1.2080591072534654,0.23529411764705882,0.4183451800232288,0.998,12/54,4.58%,LTBP2	FURIN	ID2	ID3	SKI	TJP1	ID1	SMURF1	ACVR1	ENG	SMAD3	THBS1
20,prerank,Glycolysis,0.4861958820285832,1.2032580966173778,0.24723247232472326,0.7501356932153392,0.935,28/195,5.33%,ELF3	ALDOB	SDC2	GOT1	TSTA3	ENO1	CYB5A	HSPA5	PLOD2	SDC1	TPI1	ME2	HAX1	MIF	AGRN	STC1	PC	MERTK	SAP30	EXT1	GLRX	PLOD1	SOD1	DDIT4	FKBP4	ISG20	AK3	SDHC
21,prerank,Apical Surface,0.5210133686840093,1.1804845226511729,0.24290220820189273,0.6873628318584071,0.945,12/43,16.82%,HSPB1	ADIPOR2	SLC22A12	APP	PLAUR	RHCG	IL2RG	SLC2A4	SULF2	RTN4RL1	CX3CL1	MDGA1
22,prerank,Protein Secretion,-0.497691850818164,-1.1184520784158465,0.3008356545961003,0.5799808362369339,1.0,13/95,5.54%,GNAS	OCRL	AP3S1	SNX2	ARFGEF2	CLCN3	ATP1A1	SEC31A	TMED10	CAV2	AP2B1	ERGIC3	STX16
23,prerank,IL-2/STAT5 Signaling,0.4497285427759842,1.1182374217159272,0.3175182481751825,0.7265398230088496,0.976,14/193,2.04%,IFITM3	SPP1	BHLHE40	GADD45B	TGM2	MYC	IRF6	IL1R2	TNFRSF9	PLIN2	CA2	PLEC	PTRH2	GSTO1
24,prerank,Interferon Gamma Response,0.4556383206599033,1.1120091107630465,0.32653061224489793,0.6589655850540806,0.977,17/189,3.69%,IFITM3	MT2A	MYD88	PSMB2	CXCL9	CD38	CCL2	ITGB7	ISG15	SOD2	UBE2L6	TRIM26	TNFAIP3	IRF9	NAMPT	IRF8	PTPN6
25,prerank,Coagulation,-0.46902471075828267,-1.0749919850269491,0.3466299862448418,0.649151055544169,1.0,28/136,5.75%,SERPINC1	C1S	SERPINA1	TIMP1	PROS1	TIMP3	TF	A2M	SPARC	C9	FURIN	CFB	MMP2	HTRA1	F10	CSRP1	F9	GDA	CTSO	C1R	THBS1	PECAM1	SERPING1	RGN	C8B	F2RL2	GP1BA	PLAT
26,prerank,Interferon Alpha Response,0.4678550881139565,1.0698765098444498,0.33116883116883117,0.67350796460177,0.99,1/91,0.01%,IFITM3
27,prerank,mTORC1 Signaling,0.4155400938187286,1.0227466068755067,0.42592592592592593,0.6895639581657281,0.994,33/190,5.16%,BHLHE40	SCD	GOT1	ENO1	HSPA5	NUPR1	PLOD2	TXNRD1	CALR	ADIPOR2	TPI1	SLC9A3R1	PPA1	SQSTM1	STC1	GAPDH	CCT6A	EEF1E1	PRDX1	PSAT1	STIP1	EBP	HSPD1	NAMPT	GLRX	SLA	SQLE	DDIT4	PDK1	HSPE1	HSPA4	PFKL	NFIL3
28,prerank,Cholesterol Homeostasis,0.44124191396056206,1.0123641273624253,0.4064748201438849,0.6485781710914454,0.995,13/71,5.16%,SCD	FABP5	ATF5	MAL2	TP53INP1	FDFT1	TNFRSF12A	PCYT2	EBP	PLAUR	SQLE	ALCAM	NFIL3
29,prerank,Myogenesis,-0.4261181108195946,-1.008065101849803,0.44836601307189544,0.7711234998064266,1.0,37/198,11.09%,GPX3	COL1A1	MYH9	COL3A1	GABARAPL2	TAGLN	COL4A2	SPARC	MYLK	IGF1	APOD	IGFBP7	ACSL1	PLXNB2	AEBP1	COL15A1	MEF2D	CRAT	LAMA2	FHL1	ADCY9	DMD	TPD52L1	FABP3	GSN	CLU	SVIL	TPM2	ITGA7	IGFBP3	PTGIS	EPHB3	SOD3	CKMT2	CDKN1A	HDAC5	PPP1R3C
30,prerank,IL-6/JAK/STAT3 Signaling,-0.4447854607230659,-1.0077805473849382,0.43496503496503497,0.7314476434989914,1.0,7/87,4.39%,PLA2G2A	A2M	IL1R1	IL3RA	STAM2	FAS	CD14
31,prerank,heme Metabolism,-0.4155169064605447,-0.9963180113658477,0.46408839779005523,0.721230662020906,1.0,25/187,7.55%,SLC30A1	KAT2B	ALDH6A1	MGST3	NCOA4	BNIP3L	EIF2AK1	AQP3	RBM5	HBB	NEK7	CLCN3	RAD23A	MKRN1	TNS1	EZH1	MPP1	LRP10	TOP1	FBXO34	HAGH	ALAD	NUDT4	CAT	XPO7
32,prerank,Bile Acid Metabolism,-0.41863427845568585,-0.9555236664634879,0.5207756232686981,0.7761778662684586,1.0,21/111,8.59%,SERPINA6	PHYH	AQP9	PIPOX	CYP8B1	GSTK1	CROT	ACSL1	DHCR24	PXMP2	PNPLA8	AMACR	SLC27A2	GC	NEDD4	PEX1	EPHX2	CAT	RXRA	FADS2	GNMT
33,prerank,Apoptosis,-0.41089794123526313,-0.9536017172962591,0.530949105914718,0.7453354450427621,1.0,19/157,4.41%,TIMP1	VDAC2	GPX3	TXNIP	TIMP3	PEA15	GPX4	DCN	SAT1	BGN	BNIP3L	GSR	MMP2	LUM	BCAP31	DFFA	FAS	CD14	DNAJA1
34,prerank,KRAS Signaling Up,-0.4042837555656343,-0.9529079003304892,0.5206611570247934,0.7143947886683836,1.0,20/192,4.64%,RBP4	CFHR2	SPARCL1	PIGR	TMEM176A	PLVAP	GNG11	CFB	ID2	INHBA	APOD	CROT	PLEK2	MAP3K1	ANXA10	FCER1G	ANO1	ENG	PECAM1	TFPI
35,prerank,Unfolded Protein Response,0.4002062937701715,0.9504505052029534,0.44765342960288806,0.7015384615384614,0.999,19/106,6.48%,IGFBP1	HSPA5	EIF4A1	CEBPB	CALR	CEBPG	BANF1	NOP56	EIF4A2	CCL2	PSAT1	ATF4	DKC1	YIF1A	HERPUD1	DDIT4	CKS1B	PARN	ATF3
36,prerank,DNA Repair,-0.3984726809812283,-0.9392808386823012,0.5468531468531469,0.7112357723577236,1.0,9/138,5.92%,RBX1	DGUOK	GPX4	MRPL40	BCAP31	HPRT1	NME4	DGCR8	MPG
37,prerank,Fatty Acid Metabolism,0.38193257401492653,0.937353211717737,0.5190311418685121,0.6746801517067004,0.999,24/152,5.33%,DECR1	ADH1C	CYP4A11	HSD17B4	GRHPR	ADIPOR2	MIF	ACADL	ECHS1	CA2	ALDH1A1	UGDH	HAO2	UBE2L6	SUCLG2	CA4	UROS	PRDX6	ACO2	CCDC58	VNN1	MGLL	HSP90AA1	SDHC
38,prerank,Pancreas Beta Cells,-0.45554198144034724,-0.9353389306709681,0.5472263868065967,0.6906324738675959,1.0,5/37,11.22%,SRP14	SEC11A	SPCS1	FOXA2	FOXO1
39,prerank,Myc Targets V2,0.40847621676412976,0.9136623884344912,0.5015873015873016,0.6689793510324484,1.0,12/58,7.74%,MYC	NOP56	RCL1	IPO4	HSPD1	GRWD1	NDUFAF4	WDR74	SRM	HSPE1	PPRC1	UNG
40,prerank,PI3K/AKT/mTOR Signaling,0.3873607163936385,0.9026488472746939,0.5381944444444444,0.6444867256637169,1.0,10/104,4.83%,PFN1	ARF1	CALR	MYD88	PLA2G12A	SQSTM1	SFN	SLA	CFL1	PDK1
41,prerank,Estrogen Response Late,0.3664756645675818,0.8772983442308331,0.6215277777777778,0.647167100468506,1.0,20/194,4.92%,ASS1	SERPINA3	FABP5	TSTA3	SIAH2	IL6ST	CCND1	SLC9A3R1	FDFT1	CA2	UGDH	CACNA2D2	COX6C	SFN	SLC29A1	PTPN6	KLF4	FKBP4	ISG20	IL17RB
42,prerank,Estrogen Response Early,0.36188647056954865,0.8623018091923039,0.624,0.6359488692232056,1.0,22/192,4.92%,BHLHE40	ELF3	TGM2	MYC	SIAH2	IL6ST	ESRP2	CCND1	SLC9A3R1	KRT18	NAV2	FDFT1	TSKU	LAD1	SFN	SLC7A2	TGIF2	CLDN7	THSD4	KLF4	FKBP4	IL17RB
43,prerank,Inflammatory Response,-0.3587593702976029,-0.8595562308368995,0.697986577181208,0.8069139640846958,1.0,23/197,11.53%,TIMP1	AQP9	INHBA	IL1R1	ACVR2A	CD14	STAB1	NFKB1	GABBR1	AHR	GP1BA	TPBG	MET	ATP2A2	IFITM1	HPN	CYBB	MARCO	MMP14	CDKN1A	CD82	BST2	PTGIR
44,prerank,Spermatogenesis,-0.3636662146653095,-0.8478338804419265,0.6713881019830028,0.7965187766163376,1.0,10/132,12.09%,CLVS1	STAM2	VDAC3	ZC3H14	TALDO1	CFTR	BRAF	PCSK1N	PEBP1	POMC
45,prerank,G2-M Checkpoint,0.3437860946797204,0.8384215623888406,0.6524822695035462,0.639716814159292,1.0,10/182,4.20%,MT2A	HSPA8	ATF5	MYC	HMGN2	CCND1	SAP30	E2F2	DKC1	SQLE
46,prerank,p53 Pathway,-0.3280025452041844,-0.7906783814192263,0.7981283422459893,0.8654076655052265,1.0,20/188,8.73%,TXNIP	EPHX1	IRAK1	SAT1	RPS27L	BLCAP	IFI30	DCXR	ABAT	PLXNB2	FAS	SP1	TAX1BP3	TOB1	CCNG1	CCND2	RXRA	TPD52L1	GADD45A	IER5
47,prerank,Wnt-beta Catenin Signaling,-0.36269351745636724,-0.7548606220194465,0.7632776934749621,0.8902732187913013,1.0,10/42,12.99%,NCSTN	TCF7	CCND2	GNAI1	SKP2	NKD1	HDAC5	PPARD	AXIN1	AXIN2
48,prerank,E2F Targets,-0.3013117539447323,-0.7162415904567215,0.9029649595687331,0.9110327526132403,1.0,41/184,19.63%,DNMT1	HUS1	CTCF	PSMC3IP	ILF3	TUBB	GSPT1	CDK4	PRPS1	CSE1L	LUC7L3	RANBP1	SMC1A	PAICS	CBX5	SSRP1	LBR	CDKN1A	SMC4	TBRG4	MTHFD2	SMC6	XPO1	MCM3	RRM2	ASF1A	WEE1	STMN1	RAD50	TIMELESS	SUV39H1	EXOSC8	MCM5	NCAPD2	NUDT21	USP1	XRCC6	PMS2	POLD1	WDR90	EZH2
49,prerank,KRAS Signaling Dn,-0.2775257239162659,-0.6654985904672972,0.9497964721845319,0.9312891986062718,1.0,8/188,6.16%,ITIH3	FGGY	IGFBP2	C5	GPRC5C	GP1BA	YPEL1	MTHFR
