# Supplementary material for: Stage-dependent transcriptional regulation of ICOS across metabolic liver disease progression and hepatocellular carcinoma
Source: Research Square preprint supplement (doi:10.21203/rs.3.rs-8834306/v1), 2026-02-11
Supplement: Supplementary file 3 [file 84cbb3451df04be97b6ea4b3.xlsx]

## Sheet: GSE89632_clean_metadata
GSM_ID	Diagnosis	Group
"GSM2385720"	SS	MASLD
"GSM2385721"	NASH	MASH
"GSM2385722"	SS	MASLD
"GSM2385723"	SS	MASLD
"GSM2385724"	SS	MASLD
"GSM2385725"	SS	MASLD
"GSM2385726"	SS	MASLD
"GSM2385727"	SS	MASLD
"GSM2385728"	NASH	MASH
"GSM2385729"	NASH	MASH
"GSM2385730"	SS	MASLD
"GSM2385731"	NASH	MASH
"GSM2385732"	NASH	MASH
"GSM2385733"	SS	MASLD
"GSM2385734"	SS	MASLD
"GSM2385735"	NASH	MASH
"GSM2385736"	NASH	MASH
"GSM2385737"	NASH	MASH
"GSM2385738"	SS	MASLD
"GSM2385739"	NASH	MASH
"GSM2385740"	SS	MASLD
"GSM2385741"	NASH	MASH
"GSM2385742"	NASH	MASH
"GSM2385743"	NASH	MASH
"GSM2385744"	SS	MASLD
"GSM2385745"	SS	MASLD
"GSM2385746"	SS	MASLD
"GSM2385747"	SS	MASLD
"GSM2385748"	NASH	MASH
"GSM2385749"	SS	MASLD
"GSM2385750"	NASH	MASH
"GSM2385751"	NASH	MASH
"GSM2385752"	NASH	MASH
"GSM2385753"	NASH	MASH
"GSM2385754"	NASH	MASH
"GSM2385755"	SS	MASLD
"GSM2385756"	NASH	MASH
"GSM2385757"	HC	Healthy
"GSM2385758"	HC	Healthy
"GSM2385759"	HC	Healthy
"GSM2385760"	HC	Healthy
"GSM2385761"	HC	Healthy
"GSM2385762"	HC	Healthy
"GSM2385763"	HC	Healthy
"GSM2385764"	HC	Healthy
"GSM2385765"	HC	Healthy
"GSM2385766"	HC	Healthy
"GSM2385767"	HC	Healthy
"GSM2385768"	HC	Healthy
"GSM2385769"	HC	Healthy
"GSM2385770"	HC	Healthy
"GSM2385771"	HC	Healthy
"GSM2385772"	HC	Healthy
"GSM2385773"	SS	MASLD
"GSM2385774"	HC	Healthy
"GSM2385775"	HC	Healthy
"GSM2385776"	HC	Healthy
"GSM2385777"	SS	MASLD
"GSM2385778"	HC	Healthy
"GSM2385779"	HC	Healthy
"GSM2385780"	HC	Healthy
"GSM2385781"	HC	Healthy
"GSM2385782"	HC	Healthy
