# Supplementary material for: Stage-dependent transcriptional regulation of ICOS across metabolic liver disease progression and hepatocellular carcinoma
Source: Research Square preprint supplement (doi:10.21203/rs.3.rs-8834306/v1), 2026-02-11
Supplement: Supplementary file 4 [file 9135a86443f62d52bd2150fb.xlsx]

## Sheet: GSE164760_clean_metadata
GSM_ID	Sample_title	Group
"GSM5018268"	"Liver_Healthy_1"	Healthy
"GSM5018269"	"Liver_Healthy_2"	Healthy
"GSM5018270"	"Liver_Healthy_3"	Healthy
"GSM5018271"	"Liver_Healthy_4"	Healthy
"GSM5018272"	"Liver_Healthy_5"	Healthy
"GSM5018273"	"Liver_Healthy_6"	Healthy
"GSM5018274"	"Liver_Cirrhotic_1"	Cirrhosis
"GSM5018275"	"Liver_Cirrhotic_2"	Cirrhosis
"GSM5018276"	"Liver_Cirrhotic_3"	Cirrhosis
"GSM5018277"	"Liver_Cirrhotic_4"	Cirrhosis
"GSM5018278"	"Liver_Cirrhotic_5"	Cirrhosis
"GSM5018279"	"Liver_Cirrhotic_6"	Cirrhosis
"GSM5018280"	"Liver_Cirrhotic_7"	Cirrhosis
"GSM5018281"	"Liver_Cirrhotic_8"	Cirrhosis
"GSM5018282"	"Liver_NASH_1"	NASH
"GSM5018283"	"Liver_NASH_2"	NASH
"GSM5018284"	"Liver_NASH_3"	NASH
"GSM5018285"	"Liver_NASH_4"	NASH
"GSM5018286"	"Liver_NASH_5"	NASH
"GSM5018287"	"Liver_NASH_6"	NASH
"GSM5018288"	"Liver_NASH_7"	NASH
"GSM5018289"	"Liver_NASH_8"	NASH
"GSM5018290"	"Liver_NASH_9"	NASH
"GSM5018291"	"Liver_NASH_10"	NASH
"GSM5018292"	"Liver_NASH_11"	NASH
"GSM5018293"	"Liver_NASH_12"	NASH
"GSM5018294"	"Liver_NASH_13"	NASH
"GSM5018295"	"Liver_NASH_14"	NASH
"GSM5018296"	"Liver_NASH_15"	NASH
"GSM5018297"	"Liver_NASH_16"	NASH
"GSM5018298"	"Liver_NASH_17"	NASH
"GSM5018299"	"Liver_NASH_18"	NASH
"GSM5018300"	"Liver_NASH_19"	NASH
"GSM5018301"	"Liver_NASH_20"	NASH
"GSM5018302"	"Liver_NASH_21"	NASH
"GSM5018303"	"Liver_NASH_22"	NASH
"GSM5018304"	"Liver_NASH_23"	NASH
"GSM5018305"	"Liver_NASH_24"	NASH
"GSM5018306"	"Liver_NASH_25"	NASH
"GSM5018307"	"Liver_NASH_26"	NASH
"GSM5018308"	"Liver_NASH_27"	NASH
"GSM5018309"	"Liver_NASH_28"	NASH
"GSM5018310"	"Liver_NASH_29"	NASH
"GSM5018311"	"Liver_NASH_30"	NASH
"GSM5018312"	"Liver_NASH_31"	NASH
"GSM5018313"	"Liver_NASH_32"	NASH
"GSM5018314"	"Liver_NASH_33"	NASH
"GSM5018315"	"Liver_NASH_34"	NASH
"GSM5018316"	"Liver_NASH_35"	NASH
"GSM5018317"	"Liver_NASH_36"	NASH
"GSM5018318"	"Liver_NASH_37"	NASH
"GSM5018319"	"Liver_NASH_38"	NASH
"GSM5018320"	"Liver_NASH_39"	NASH
"GSM5018321"	"Liver_NASH_40"	NASH
"GSM5018322"	"Liver_NASH_41"	NASH
"GSM5018323"	"Liver_NASH_42"	NASH
"GSM5018324"	"Liver_NASH_43"	NASH
"GSM5018325"	"Liver_NASH_44"	NASH
"GSM5018326"	"Liver_NASH_45"	NASH
"GSM5018327"	"Liver_NASH_46"	NASH
"GSM5018328"	"Liver_NASH_47"	NASH
"GSM5018329"	"Liver_NASH_48"	NASH
"GSM5018330"	"Liver_NASH_49"	NASH
"GSM5018331"	"Liver_NASH_50"	NASH
"GSM5018332"	"Liver_NASH_51"	NASH
"GSM5018333"	"Liver_NASH_52"	NASH
"GSM5018334"	"Liver_NASH_53"	NASH
"GSM5018335"	"Liver_NASH_54"	NASH
"GSM5018336"	"Liver_NASH_55"	NASH
"GSM5018337"	"Liver_NASH_56"	NASH
"GSM5018338"	"Liver_NASH_57"	NASH
"GSM5018339"	"Liver_NASH_58"	NASH
"GSM5018340"	"Liver_NASH_59"	NASH
"GSM5018341"	"Liver_NASH_60"	NASH
"GSM5018342"	"Liver_NASH_61"	NASH
"GSM5018343"	"Liver_NASH_62"	NASH
"GSM5018344"	"Liver_NASH_63"	NASH
"GSM5018345"	"Liver_NASH_64"	NASH
"GSM5018346"	"Liver_NASH_65"	NASH
"GSM5018347"	"Liver_NASH_66"	NASH
"GSM5018348"	"Liver_NASH_67"	NASH
"GSM5018349"	"Liver_NASH_68"	NASH
"GSM5018350"	"Liver_NASH_69"	NASH
"GSM5018351"	"Liver_NASH_70"	NASH
"GSM5018352"	"Liver_NASH_71"	NASH
"GSM5018353"	"Liver_NASH_72"	NASH
"GSM5018354"	"Liver_NASH_73"	NASH
"GSM5018355"	"Liver_NASH_74"	NASH
"GSM5018356"	"Liver_NASH-HCC_NonTumoral_Adjacent_1"	Adjacent
"GSM5018357"	"Liver_NASH-HCC_NonTumoral_Adjacent_2"	Adjacent
"GSM5018358"	"Liver_NASH-HCC_NonTumoral_Adjacent_3"	Adjacent
"GSM5018359"	"Liver_NASH-HCC_NonTumoral_Adjacent_4"	Adjacent
"GSM5018360"	"Liver_NASH-HCC_NonTumoral_Adjacent_5"	Adjacent
"GSM5018361"	"Liver_NASH-HCC_NonTumoral_Adjacent_6"	Adjacent
"GSM5018362"	"Liver_NASH-HCC_NonTumoral_Adjacent_7"	Adjacent
"GSM5018363"	"Liver_NASH-HCC_NonTumoral_Adjacent_8"	Adjacent
"GSM5018364"	"Liver_NASH-HCC_NonTumoral_Adjacent_9"	Adjacent
"GSM5018365"	"Liver_NASH-HCC_NonTumoral_Adjacent_10"	Adjacent
"GSM5018366"	"Liver_NASH-HCC_NonTumoral_Adjacent_11"	Adjacent
"GSM5018367"	"Liver_NASH-HCC_NonTumoral_Adjacent_12"	Adjacent
"GSM5018368"	"Liver_NASH-HCC_NonTumoral_Adjacent_13"	Adjacent
"GSM5018369"	"Liver_NASH-HCC_NonTumoral_Adjacent_14"	Adjacent
"GSM5018370"	"Liver_NASH-HCC_NonTumoral_Adjacent_15"	Adjacent
"GSM5018371"	"Liver_NASH-HCC_NonTumoral_Adjacent_16"	Adjacent
"GSM5018372"	"Liver_NASH-HCC_NonTumoral_Adjacent_17"	Adjacent
"GSM5018373"	"Liver_NASH-HCC_NonTumoral_Adjacent_18"	Adjacent
"GSM5018374"	"Liver_NASH-HCC_NonTumoral_Adjacent_19"	Adjacent
"GSM5018375"	"Liver_NASH-HCC_NonTumoral_Adjacent_20"	Adjacent
"GSM5018376"	"Liver_NASH-HCC_NonTumoral_Adjacent_21"	Adjacent
"GSM5018377"	"Liver_NASH-HCC_NonTumoral_Adjacent_22"	Adjacent
"GSM5018378"	"Liver_NASH-HCC_NonTumoral_Adjacent_23"	Adjacent
"GSM5018379"	"Liver_NASH-HCC_NonTumoral_Adjacent_24"	Adjacent
"GSM5018380"	"Liver_NASH-HCC_NonTumoral_Adjacent_25"	Adjacent
"GSM5018381"	"Liver_NASH-HCC_NonTumoral_Adjacent_26"	Adjacent
"GSM5018382"	"Liver_NASH-HCC_NonTumoral_Adjacent_27"	Adjacent
"GSM5018383"	"Liver_NASH-HCC_NonTumoral_Adjacent_28"	Adjacent
"GSM5018384"	"Liver_NASH-HCC_NonTumoral_Adjacent_29"	Adjacent
"GSM5018385"	"Liver_NASH-HCC_Tumor_1"	Tumor
"GSM5018386"	"Liver_NASH-HCC_Tumor_2"	Tumor
"GSM5018387"	"Liver_NASH-HCC_Tumor_3"	Tumor
"GSM5018388"	"Liver_NASH-HCC_Tumor_4"	Tumor
"GSM5018389"	"Liver_NASH-HCC_Tumor_5"	Tumor
"GSM5018390"	"Liver_NASH-HCC_Tumor_6"	Tumor
"GSM5018391"	"Liver_NASH-HCC_Tumor_7"	Tumor
"GSM5018392"	"Liver_NASH-HCC_Tumor_8"	Tumor
"GSM5018393"	"Liver_NASH-HCC_Tumor_9"	Tumor
"GSM5018394"	"Liver_NASH-HCC_Tumor_10"	Tumor
"GSM5018395"	"Liver_NASH-HCC_Tumor_11"	Tumor
"GSM5018396"	"Liver_NASH-HCC_Tumor_12"	Tumor
"GSM5018397"	"Liver_NASH-HCC_Tumor_13"	Tumor
"GSM5018398"	"Liver_NASH-HCC_Tumor_14"	Tumor
"GSM5018399"	"Liver_NASH-HCC_Tumor_15"	Tumor
"GSM5018400"	"Liver_NASH-HCC_Tumor_16"	Tumor
"GSM5018401"	"Liver_NASH-HCC_Tumor_17"	Tumor
"GSM5018402"	"Liver_NASH-HCC_Tumor_18"	Tumor
"GSM5018403"	"Liver_NASH-HCC_Tumor_19"	Tumor
"GSM5018404"	"Liver_NASH-HCC_Tumor_20"	Tumor
"GSM5018405"	"Liver_NASH-HCC_Tumor_21"	Tumor
"GSM5018406"	"Liver_NASH-HCC_Tumor_22"	Tumor
"GSM5018407"	"Liver_NASH-HCC_Tumor_23"	Tumor
"GSM5018408"	"Liver_NASH-HCC_Tumor_24"	Tumor
"GSM5018409"	"Liver_NASH-HCC_Tumor_25"	Tumor
"GSM5018410"	"Liver_NASH-HCC_Tumor_26"	Tumor
"GSM5018411"	"Liver_NASH-HCC_Tumor_27"	Tumor
"GSM5018412"	"Liver_NASH-HCC_Tumor_28"	Tumor
"GSM5018413"	"Liver_NASH-HCC_Tumor_29"	Tumor
"GSM5018414"	"Liver_NASH-HCC_Tumor_30"	Tumor
"GSM5018415"	"Liver_NASH-HCC_Tumor_31"	Tumor
"GSM5018416"	"Liver_NASH-HCC_Tumor_32"	Tumor
"GSM5018417"	"Liver_NASH-HCC_Tumor_33"	Tumor
"GSM5018418"	"Liver_NASH-HCC_Tumor_34"	Tumor
"GSM5018419"	"Liver_NASH-HCC_Tumor_35"	Tumor
"GSM5018420"	"Liver_NASH-HCC_Tumor_36"	Tumor
"GSM5018421"	"Liver_NASH-HCC_Tumor_37"	Tumor
"GSM5018422"	"Liver_NASH-HCC_Tumor_38"	Tumor
"GSM5018423"	"Liver_NASH-HCC_Tumor_39"	Tumor
"GSM5018424"	"Liver_NASH-HCC_Tumor_40"	Tumor
"GSM5018425"	"Liver_NASH-HCC_Tumor_41"	Tumor
"GSM5018426"	"Liver_NASH-HCC_Tumor_42"	Tumor
"GSM5018427"	"Liver_NASH-HCC_Tumor_43"	Tumor
"GSM5018428"	"Liver_NASH-HCC_Tumor_44"	Tumor
"GSM5018429"	"Liver_NASH-HCC_Tumor_45"	Tumor
"GSM5018430"	"Liver_NASH-HCC_Tumor_46"	Tumor
"GSM5018431"	"Liver_NASH-HCC_Tumor_47"	Tumor
"GSM5018432"	"Liver_NASH-HCC_Tumor_48"	Tumor
"GSM5018433"	"Liver_NASH-HCC_Tumor_49"	Tumor
"GSM5018434"	"Liver_NASH-HCC_Tumor_50"	Tumor
"GSM5018435"	"Liver_NASH-HCC_Tumor_51"	Tumor
"GSM5018436"	"Liver_NASH-HCC_Tumor_52"	Tumor
"GSM5018437"	"Liver_NASH-HCC_Tumor_53"	Tumor
